# Supplementary material
Source: PubMed Central journal article supplement (PMC5270575)
Supplement: ismej2016134x1.pdf [file ismej2016134x1.pdf]

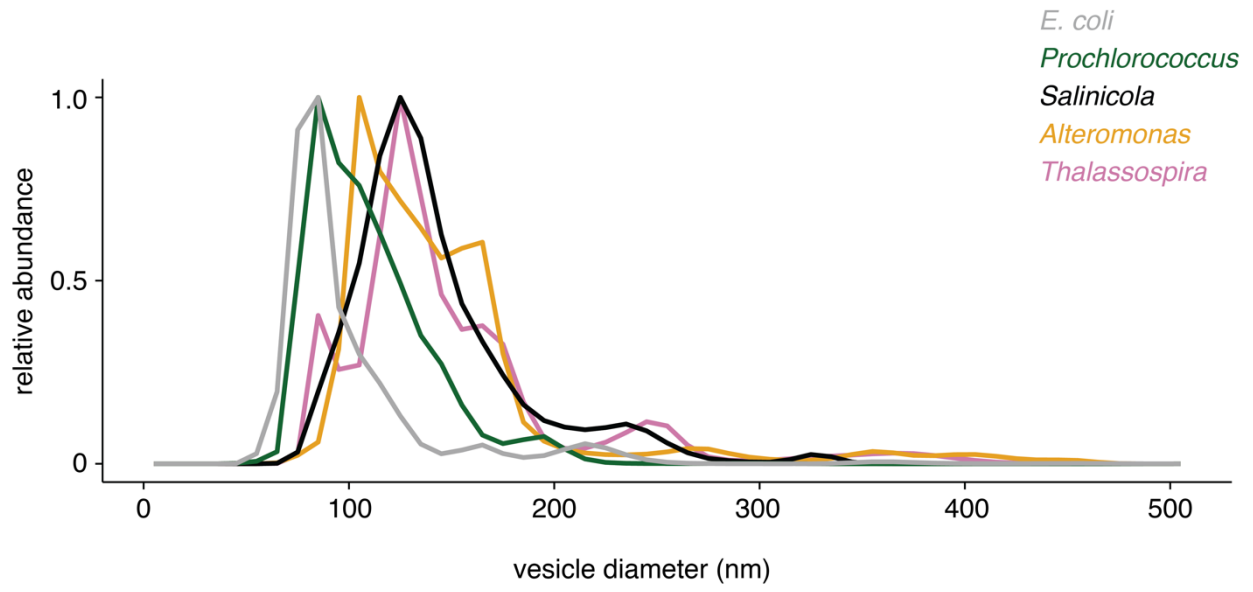

**Supplemental Figure 1** Vesicle size distributions. Values indicate the average of three independent measurements of vesicles from each culture, as determined by nanoparticle tracking analysis.

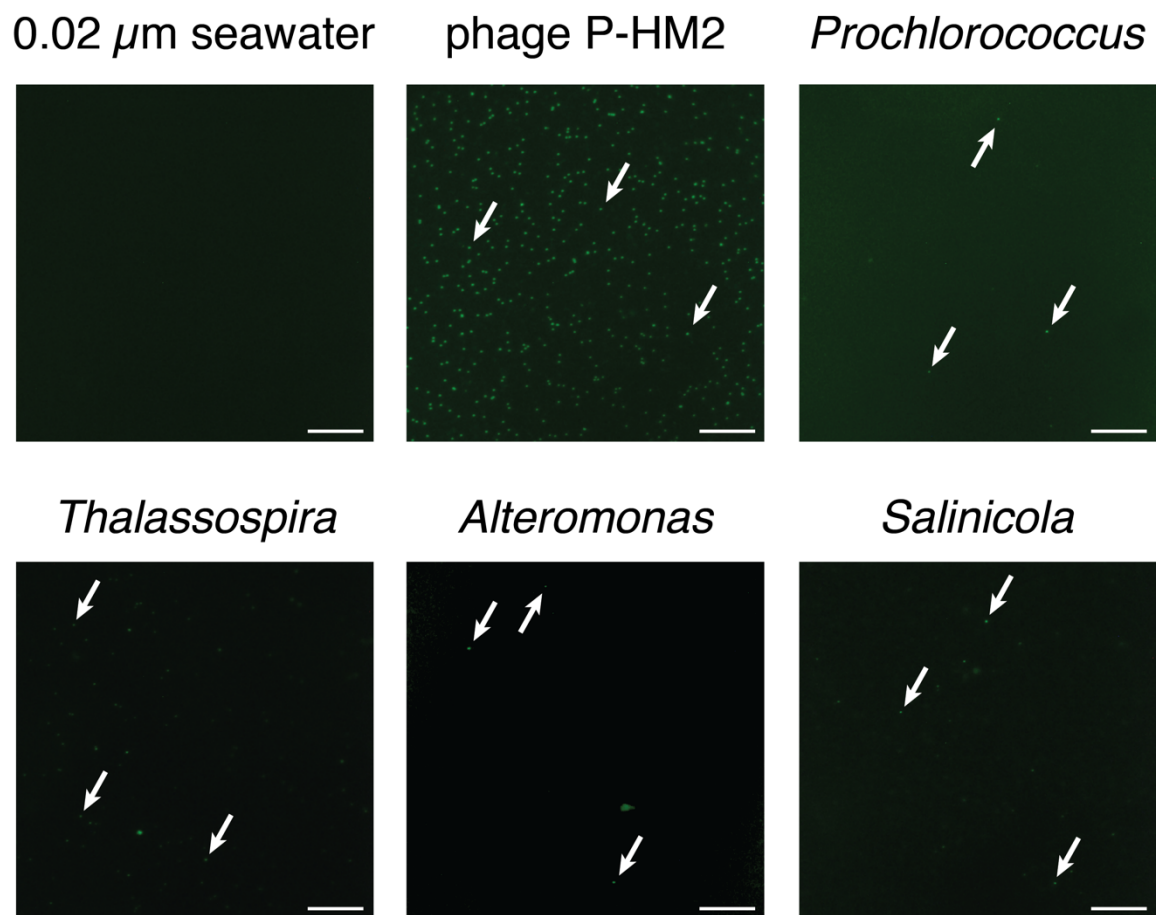

**Supplemental Figure 2** SYBR Gold-stained filters containing 0.02  $\mu\text{m}$ -filtered seawater (negative control), the myovirus P-HM2 (positive control), or vesicles purified from cultures of the indicated bacterium. Arrows highlight representative examples of SYBR-visible particles. Scale bars: 10  $\mu\text{m}$  in all panels.

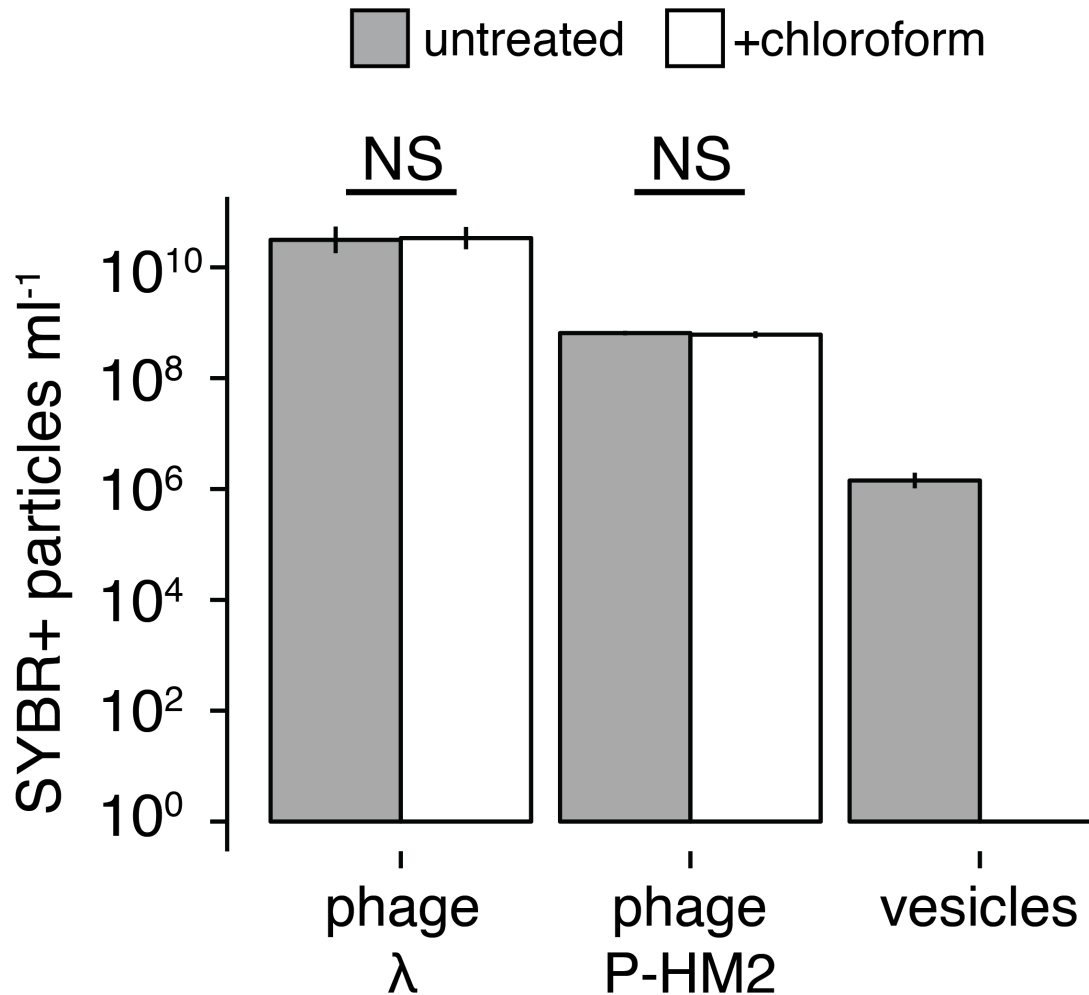

**Supplemental Figure 3** Impact of chloroform treatment on epifluorescence counts of vesicles and phages. Concentrations of SYBR Gold-visible particles with and without chloroform treatment, as determined by either flow cytometry (phage lambda) or epifluorescence microscopy (myovirus P-HM2 and vesicles purified from *Prochlorococcus*). Chloroform significantly impacted the concentrations of SYBR-visible vesicles ( $P < 0.05$ , two-tailed t test) but not the phages; NS= not significant. Values indicate the mean and SD of two to three biological replicates.
